# Supplementary material for: Molecular characterization of Campylobacter spp. recovered from beef, chicken, lamb and pork products at retail in Australia
Source: PubMed Central journal article supplement (PMC7392323; doi:10.1371/journal.pone.0236889), 2020-07-30
Supplement: pone.0236889.s006.pdf [file pone.0236889.s006.pdf]

**Table S1**

Accession numbers of *Campylobacter coli* and *Campylobacter jejuni* collected from retail beef, chicken, lamb and pork products from Australian retail outlets.

| <b>Isolate No.</b> | <b>Species</b>   | <b>ST</b> | <b>Source</b> | <b>Accession number</b> |
|--------------------|------------------|-----------|---------------|-------------------------|
| 17N3033F1          | <i>C. jejuni</i> | 21        | Beef          | SRR10537798             |
| 17Q3133F1          | <i>C. jejuni</i> | 21        | Lamb          | SRR10538057             |
| 18A3017F1          | <i>C. jejuni</i> | 21        | Chicken       | SRR10537645             |
| 18A3023F1          | <i>C. jejuni</i> | 21        | Chicken       | SRR10537567             |
| 18A3024F1          | <i>C. jejuni</i> | 21        | Chicken       | SRR10537556             |
| 18A3035F1          | <i>C. jejuni</i> | 21        | Chicken       | SRR10537468             |
| 18A3068F1          | <i>C. jejuni</i> | 21        | Chicken       | SRR10537823             |
| 18N3065F1          | <i>C. jejuni</i> | 21        | Lamb          | SRR10537670             |
| 18Q3043F1          | <i>C. jejuni</i> | 21        | Pork          | SRR10538002             |
| 17Q3007F1          | <i>C. jejuni</i> | 38        | Beef          | SRR10537582             |
| 17Q3008F1          | <i>C. jejuni</i> | 42        | Beef          | SRR10537581             |
| 18N3026F1          | <i>C. jejuni</i> | 42        | Lamb          | SRR10537698             |
| 18N3033F1          | <i>C. jejuni</i> | 42        | Lamb          | SRR10537691             |
| 18N3056F1          | <i>C. jejuni</i> | 42        | Lamb          | SRR10537676             |
| 18N3069F1          | <i>C. jejuni</i> | 42        | Chicken       | SRR10537665             |
| 18N3081F1          | <i>C. jejuni</i> | 42        | Pork          | SRR10537652             |
| 18V3071F1          | <i>C. jejuni</i> | 42        | Chicken       | SRR10537855             |
| 17Q3049F1          | <i>C. jejuni</i> | 45        | Chicken       | SRR10537536             |
| 17Q3072F1          | <i>C. jejuni</i> | 45        | Chicken       | SRR10537511             |
| 17Q3122F1          | <i>C. jejuni</i> | 45        | Chicken       | SRR10538067             |
| 17V3030F1          | <i>C. jejuni</i> | 45        | Chicken       | SRR10537967             |
| 17V3055F1          | <i>C. jejuni</i> | 45        | Chicken       | SRR10537943             |
| 17V3060F1          | <i>C. jejuni</i> | 45        | Chicken       | SRR10537935             |
| 18N3054F1          | <i>C. jejuni</i> | 45        | Chicken       | SRR10537680             |
| 18V3008F1          | <i>C. jejuni</i> | 45        | Chicken       | SRR10537926             |
| 18V3070F1          | <i>C. jejuni</i> | 45        | Chicken       | SRR10537856             |
| 17N3065F1          | <i>C. jejuni</i> | 46        | Chicken       | SRR10537782             |
| 17Q3060F1          | <i>C. jejuni</i> | 46        | Chicken       | SRR10537525             |
| 18N3153F1          | <i>C. jejuni</i> | 46        | Chicken       | SRR10537627             |
| 18Q3021F1          | <i>C. jejuni</i> | 46        | Chicken       | SRR10538025             |
| 18V3085F2          | <i>C. jejuni</i> | 46        | Chicken       | SRR10537836             |
| 19N3083F1          | <i>C. jejuni</i> | 46        | Chicken       | SRR10537616             |
| 19N3111F1          | <i>C. jejuni</i> | 46        | Pork          | SRR10537607             |
| 17N3105F1          | <i>C. jejuni</i> | 48        | Chicken       | SRR10537762             |
| 17V3029F1          | <i>C. jejuni</i> | 48        | Chicken       | SRR10537968             |
| 18A3011F1          | <i>C. jejuni</i> | 48        | Chicken       | SRR10537712             |
| 18A3012F1          | <i>C. jejuni</i> | 48        | Lamb          | SRR10537701             |
| 18V3078F1          | <i>C. jejuni</i> | 48        | Chicken       | SRR10537844             |
| 17N3027F1          | <i>C. jejuni</i> | 49        | Chicken       | SRR10537804             |
| 17Q3111F1          | <i>C. jejuni</i> | 49        | Chicken       | SRR10537463             |
| 17Q3127F1          | <i>C. jejuni</i> | 49        | Chicken       | SRR10538061             |
| 17V3012F2          | <i>C. jejuni</i> | 49        | Chicken       | SRR10537983             |
| 17V3033F1          | <i>C. jejuni</i> | 49        | Chicken       | SRR10537961             |
| 17N3042F1          | <i>C. jejuni</i> | 50        | Lamb          | SRR10537794             |
| 17N3053F1          | <i>C. jejuni</i> | 50        | Lamb          | SRR10537787             |

|           |                  |    |         |             |
|-----------|------------------|----|---------|-------------|
| 17N3062F1 | <i>C. jejuni</i> | 50 | Beef    | SRR10537783 |
| 17N3070F1 | <i>C. jejuni</i> | 50 | Lamb    | SRR10537777 |
| 17N3080F1 | <i>C. jejuni</i> | 50 | Beef    | SRR10537770 |
| 17N3175F1 | <i>C. jejuni</i> | 50 | Chicken | SRR10537747 |
| 17N3205F1 | <i>C. jejuni</i> | 50 | Chicken | SRR10537741 |
| 17Q3001F4 | <i>C. jejuni</i> | 50 | Beef    | SRR10537588 |
| 17Q3012F1 | <i>C. jejuni</i> | 50 | Lamb    | SRR10537576 |
| 17Q3014F1 | <i>C. jejuni</i> | 50 | Lamb    | SRR10537574 |
| 17Q3018F1 | <i>C. jejuni</i> | 50 | Lamb    | SRR10537570 |
| 17Q3056F1 | <i>C. jejuni</i> | 50 | Chicken | SRR10537529 |
| 17Q3062F1 | <i>C. jejuni</i> | 50 | Chicken | SRR10537522 |
| 17Q3066F1 | <i>C. jejuni</i> | 50 | Chicken | SRR10537518 |
| 17Q3071F1 | <i>C. jejuni</i> | 50 | Chicken | SRR10537513 |
| 17Q3074F1 | <i>C. jejuni</i> | 50 | Chicken | SRR10537509 |
| 17Q3082F1 | <i>C. jejuni</i> | 50 | Chicken | SRR10537500 |
| 17Q3092F1 | <i>C. jejuni</i> | 50 | Lamb    | SRR10537483 |
| 17Q3093F1 | <i>C. jejuni</i> | 50 | Lamb    | SRR10537482 |
| 17Q3097F1 | <i>C. jejuni</i> | 50 | Chicken | SRR10537477 |
| 17Q3102F1 | <i>C. jejuni</i> | 50 | Chicken | SRR10537472 |
| 17Q3108F1 | <i>C. jejuni</i> | 50 | Chicken | SRR10537466 |
| 17Q3113F1 | <i>C. jejuni</i> | 50 | Chicken | SRR10537461 |
| 17Q3114F2 | <i>C. jejuni</i> | 50 | Chicken | SRR10537460 |
| 17Q3136F1 | <i>C. jejuni</i> | 50 | Chicken | SRR10538054 |
| 18A3015F1 | <i>C. jejuni</i> | 50 | Lamb    | SRR10537667 |
| 18A3021F1 | <i>C. jejuni</i> | 50 | Chicken | SRR10537601 |
| 18A3025F1 | <i>C. jejuni</i> | 50 | Chicken | SRR10537545 |
| 18A3047F1 | <i>C. jejuni</i> | 50 | Lamb    | SRR10538040 |
| 18A3048F1 | <i>C. jejuni</i> | 50 | Lamb    | SRR10538029 |
| 18A3050F1 | <i>C. jejuni</i> | 50 | Lamb    | SRR10538007 |
| 18A3064F1 | <i>C. jejuni</i> | 50 | Lamb    | SRR10537840 |
| 18N3002F1 | <i>C. jejuni</i> | 50 | Lamb    | SRR10537717 |
| 18N3013F1 | <i>C. jejuni</i> | 50 | Pork    | SRR10537708 |
| 18N3022F1 | <i>C. jejuni</i> | 50 | Lamb    | SRR10537703 |
| 18N3023F1 | <i>C. jejuni</i> | 50 | Lamb    | SRR10537702 |
| 18N3050F1 | <i>C. jejuni</i> | 50 | Chicken | SRR10537683 |
| 18N3090F1 | <i>C. jejuni</i> | 50 | Pork    | SRR10537642 |
| 18N3148F1 | <i>C. jejuni</i> | 50 | Lamb    | SRR10537628 |
| 18Q3010F1 | <i>C. jejuni</i> | 50 | Pork    | SRR10538037 |
| 18Q3011F1 | <i>C. jejuni</i> | 50 | Pork    | SRR10538036 |
| 18Q3012F1 | <i>C. jejuni</i> | 50 | Chicken | SRR10538035 |
| 18Q3020F1 | <i>C. jejuni</i> | 50 | Chicken | SRR10538026 |
| 18Q3030F1 | <i>C. jejuni</i> | 50 | Chicken | SRR10538016 |
| 18Q3034F1 | <i>C. jejuni</i> | 50 | Chicken | SRR10538012 |
| 18V3025F1 | <i>C. jejuni</i> | 50 | Chicken | SRR10537908 |
| 18V3038F1 | <i>C. jejuni</i> | 50 | Chicken | SRR10537893 |
| 18V3046F1 | <i>C. jejuni</i> | 50 | Chicken | SRR10537883 |
| 19N3103F1 | <i>C. jejuni</i> | 50 | Chicken | SRR10537614 |
| 19N3105F1 | <i>C. jejuni</i> | 50 | Beef    | SRR10537613 |
| 19N3116F1 | <i>C. jejuni</i> | 50 | Pork    | SRR10537603 |
| 17N3055F1 | <i>C. jejuni</i> | 51 | Chicken | SRR10537786 |

|           |                  |     |         |             |
|-----------|------------------|-----|---------|-------------|
| 17N3072F1 | <i>C. jejuni</i> | 51  | Chicken | SRR10537775 |
| 17V3028F1 | <i>C. jejuni</i> | 51  | Chicken | SRR10537969 |
| 18A3007F1 | <i>C. jejuni</i> | 51  | Chicken | SRR10537797 |
| 18A3007F2 | <i>C. jejuni</i> | 51  | Chicken | SRR10537789 |
| 18A3054F1 | <i>C. jejuni</i> | 51  | Chicken | SRR10537962 |
| 18N3094F1 | <i>C. jejuni</i> | 51  | Chicken | SRR10537638 |
| 19N3191F1 | <i>C. jejuni</i> | 52  | Chicken | SRR10537592 |
| 17N3031F1 | <i>C. jejuni</i> | 53  | Beef    | SRR10537800 |
| 17Q3004F1 | <i>C. jejuni</i> | 53  | Beef    | SRR10537585 |
| 17Q3016F1 | <i>C. jejuni</i> | 53  | Lamb    | SRR10537572 |
| 17Q3057F1 | <i>C. jejuni</i> | 53  | Chicken | SRR10537528 |
| 18A3029F1 | <i>C. jejuni</i> | 53  | Chicken | SRR10537501 |
| 18A3030F1 | <i>C. jejuni</i> | 53  | Chicken | SRR10537490 |
| 18V3024F1 | <i>C. jejuni</i> | 53  | Chicken | SRR10537909 |
| 19N3185F1 | <i>C. jejuni</i> | 53  | Chicken | SRR10537595 |
| 17N3016F1 | <i>C. jejuni</i> | 61  | Lamb    | SRR10537813 |
| 17N3090F1 | <i>C. jejuni</i> | 61  | Chicken | SRR10537766 |
| 17N3155F1 | <i>C. jejuni</i> | 61  | Beef    | SRR10537749 |
| 17Q3002F1 | <i>C. jejuni</i> | 61  | Beef    | SRR10537587 |
| 17Q3005F1 | <i>C. jejuni</i> | 61  | Beef    | SRR10537584 |
| 17Q3010F1 | <i>C. jejuni</i> | 61  | Lamb    | SRR10537578 |
| 17Q3011F1 | <i>C. jejuni</i> | 61  | Lamb    | SRR10537577 |
| 17Q3013F1 | <i>C. jejuni</i> | 61  | Lamb    | SRR10537575 |
| 17Q3017F1 | <i>C. jejuni</i> | 61  | Lamb    | SRR10537571 |
| 17Q3039F1 | <i>C. jejuni</i> | 61  | Chicken | SRR10537546 |
| 17Q3090F1 | <i>C. jejuni</i> | 61  | Beef    | SRR10537484 |
| 17Q3132F1 | <i>C. jejuni</i> | 61  | Beef    | SRR10538058 |
| 17Q3135F1 | <i>C. jejuni</i> | 61  | Lamb    | SRR10538055 |
| 18A3016F1 | <i>C. jejuni</i> | 61  | Beef    | SRR10537656 |
| 18A3032F1 | <i>C. jejuni</i> | 61  | Lamb    | SRR10537479 |
| 18A3049F1 | <i>C. jejuni</i> | 61  | Beef    | SRR10538018 |
| 18A3067F1 | <i>C. jejuni</i> | 61  | Lamb    | SRR10537829 |
| 18N3014F1 | <i>C. jejuni</i> | 61  | Lamb    | SRR10537707 |
| 18N3057F1 | <i>C. jejuni</i> | 61  | Beef    | SRR10537675 |
| 18N3064F1 | <i>C. jejuni</i> | 61  | Lamb    | SRR10537671 |
| 18Q3002F1 | <i>C. jejuni</i> | 61  | Beef    | SRR10538045 |
| 18Q3003F1 | <i>C. jejuni</i> | 61  | Lamb    | SRR10538044 |
| 18V3066F2 | <i>C. jejuni</i> | 128 | Chicken | SRR10537861 |
| 18V3004F1 | <i>C. jejuni</i> | 132 | Chicken | SRR10537930 |
| 18V3061F1 | <i>C. jejuni</i> | 132 | Chicken | SRR10537867 |
| 18A3044F1 | <i>C. jejuni</i> | 137 | Chicken | SRR10537456 |
| 18V3036F2 | <i>C. jejuni</i> | 137 | Chicken | SRR10537895 |
| 18V3084F1 | <i>C. jejuni</i> | 137 | Chicken | SRR10537838 |
| 17Q3134F1 | <i>C. jejuni</i> | 190 | Lamb    | SRR10538056 |
| 18N3036F1 | <i>C. jejuni</i> | 190 | Lamb    | SRR10537688 |
| 18Q3005F1 | <i>C. jejuni</i> | 190 | Lamb    | SRR10538042 |
| 18V3050F1 | <i>C. jejuni</i> | 190 | Chicken | SRR10537879 |
| 19N3110F1 | <i>C. jejuni</i> | 190 | Lamb    | SRR10537608 |
| 17V3035F1 | <i>C. jejuni</i> | 227 | Chicken | SRR10537959 |
| 18V3043F1 | <i>C. jejuni</i> | 227 | Chicken | SRR10537887 |

|           |                  |     |         |             |
|-----------|------------------|-----|---------|-------------|
| 17Q3087F1 | <i>C. jejuni</i> | 257 | Chicken | SRR10537491 |
| 17Q3101F1 | <i>C. jejuni</i> | 257 | Chicken | SRR10537473 |
| 17Q3121F1 | <i>C. jejuni</i> | 257 | Chicken | SRR10538068 |
| 18N3031F1 | <i>C. jejuni</i> | 257 | Chicken | SRR10537693 |
| 18N3037F1 | <i>C. jejuni</i> | 257 | Beef    | SRR10537687 |
| 17N3014F1 | <i>C. jejuni</i> | 449 | Chicken | SRR10537815 |
| 17N3087F1 | <i>C. jejuni</i> | 449 | Chicken | SRR10537768 |
| 17N3131F1 | <i>C. jejuni</i> | 449 | Chicken | SRR10537758 |
| 17Q3048F1 | <i>C. jejuni</i> | 449 | Chicken | SRR10537537 |
| 17Q3055F1 | <i>C. jejuni</i> | 449 | Chicken | SRR10537530 |
| 17Q3061F1 | <i>C. jejuni</i> | 449 | Chicken | SRR10537524 |
| 17Q3080F1 | <i>C. jejuni</i> | 449 | Chicken | SRR10537503 |
| 17Q3120F1 | <i>C. jejuni</i> | 449 | Chicken | SRR10538069 |
| 17V3022F1 | <i>C. jejuni</i> | 449 | Chicken | SRR10537972 |
| 18Q3031F1 | <i>C. jejuni</i> | 449 | Chicken | SRR10538015 |
| 18Q3037F1 | <i>C. jejuni</i> | 449 | Chicken | SRR10538009 |
| 18Q3038F1 | <i>C. jejuni</i> | 449 | Chicken | SRR10538008 |
| 17N3013F1 | <i>C. jejuni</i> | 528 | Chicken | SRR10537816 |
| 17N3076F1 | <i>C. jejuni</i> | 528 | Chicken | SRR10537773 |
| 17N3177F1 | <i>C. jejuni</i> | 528 | Chicken | SRR10537746 |
| 17N3242F1 | <i>C. jejuni</i> | 528 | Chicken | SRR10537731 |
| 17Q3109F1 | <i>C. jejuni</i> | 528 | Chicken | SRR10537465 |
| 18N3066F1 | <i>C. jejuni</i> | 528 | Chicken | SRR10537669 |
| 18V3014F1 | <i>C. jejuni</i> | 528 | Chicken | SRR10537921 |
| 18V3068F2 | <i>C. jejuni</i> | 528 | Chicken | SRR10537858 |
| 18V3079F1 | <i>C. jejuni</i> | 528 | Chicken | SRR10537843 |
| 19N3023F1 | <i>C. jejuni</i> | 528 | Chicken | SRR10537621 |
| 19N3055F1 | <i>C. jejuni</i> | 528 | Beef    | SRR10537619 |
| 17N3009F1 | <i>C. jejuni</i> | 535 | Pork    | SRR10537818 |
| 17V3052F1 | <i>C. jejuni</i> | 535 | Chicken | SRR10537944 |
| 18V3054F1 | <i>C. jejuni</i> | 535 | Chicken | SRR10537875 |
| 18V3062F1 | <i>C. jejuni</i> | 535 | Chicken | SRR10537866 |
| 18V3063F1 | <i>C. jejuni</i> | 535 | Chicken | SRR10537865 |
| 18V4087F2 | <i>C. jejuni</i> | 535 | Chicken | SRR10537834 |
| 17Q3100F1 | <i>C. jejuni</i> | 538 | Chicken | SRR10537474 |
| 18N3008F1 | <i>C. jejuni</i> | 538 | Pork    | SRR10537711 |
| 18N3009F1 | <i>C. jejuni</i> | 538 | Lamb    | SRR10537710 |
| 18V3028F1 | <i>C. jejuni</i> | 538 | Chicken | SRR10537904 |
| 18V3048F1 | <i>C. jejuni</i> | 538 | Chicken | SRR10537881 |
| 17V3042F1 | <i>C. jejuni</i> | 567 | Chicken | SRR10537952 |
| 18A3028F1 | <i>C. jejuni</i> | 567 | Chicken | SRR10537512 |
| 18Q3027F1 | <i>C. jejuni</i> | 567 | Chicken | SRR10538020 |
| 17N3030F1 | <i>C. jejuni</i> | 583 | Lamb    | SRR10537801 |
| 17Q3098F1 | <i>C. jejuni</i> | 583 | Chicken | SRR10537476 |
| 17V3015F1 | <i>C. jejuni</i> | 583 | Chicken | SRR10537980 |
| 17V3031F1 | <i>C. jejuni</i> | 583 | Chicken | SRR10537966 |
| 18Q3015F1 | <i>C. jejuni</i> | 583 | Chicken | SRR10538032 |
| 18V3047F1 | <i>C. jejuni</i> | 583 | Chicken | SRR10537882 |
| 17N3061F1 | <i>C. jejuni</i> | 658 | Chicken | SRR10537784 |
| 17N3073F1 | <i>C. jejuni</i> | 658 | Chicken | SRR10537774 |

|           |                  |     |         |             |
|-----------|------------------|-----|---------|-------------|
| 18N3076F1 | <i>C. jejuni</i> | 692 | Chicken | SRR10537658 |
| 18N3073F1 | <i>C. jejuni</i> | 696 | Chicken | SRR10537661 |
| 17Q3067F1 | <i>C. jejuni</i> | 699 | Chicken | SRR10537517 |
| 17N3026F1 | <i>C. coli</i>   | 825 | Chicken | SRR10537805 |
| 17N3028F1 | <i>C. coli</i>   | 825 | Chicken | SRR10537803 |
| 17Q3063F1 | <i>C. coli</i>   | 825 | Chicken | SRR10537521 |
| 17Q3085F2 | <i>C. coli</i>   | 825 | Chicken | SRR10537494 |
| 17V3001F1 | <i>C. coli</i>   | 825 | Chicken | SRR10537995 |
| 17V3004F1 | <i>C. coli</i>   | 825 | Chicken | SRR10537993 |
| 17V3005F1 | <i>C. coli</i>   | 825 | Chicken | SRR10537992 |
| 17V3010F1 | <i>C. coli</i>   | 825 | Chicken | SRR10537987 |
| 17V3016F1 | <i>C. coli</i>   | 825 | Chicken | SRR10537979 |
| 17V3017F1 | <i>C. coli</i>   | 825 | Chicken | SRR10537978 |
| 17V3024F1 | <i>C. coli</i>   | 825 | Chicken | SRR10537970 |
| 17V3034F1 | <i>C. coli</i>   | 825 | Chicken | SRR10537960 |
| 17V3036F1 | <i>C. coli</i>   | 825 | Chicken | SRR10537958 |
| 17V3037F1 | <i>C. coli</i>   | 825 | Chicken | SRR10537957 |
| 17V3038F1 | <i>C. coli</i>   | 825 | Chicken | SRR10537956 |
| 17V3041F1 | <i>C. coli</i>   | 825 | Chicken | SRR10537953 |
| 17V3044F1 | <i>C. coli</i>   | 825 | Chicken | SRR10537950 |
| 17V3046F1 | <i>C. coli</i>   | 825 | Chicken | SRR10537949 |
| 17V3047F1 | <i>C. coli</i>   | 825 | Chicken | SRR10537948 |
| 17V3049F1 | <i>C. coli</i>   | 825 | Chicken | SRR10537946 |
| 17V3051F1 | <i>C. coli</i>   | 825 | Chicken | SRR10537945 |
| 17V3056F1 | <i>C. coli</i>   | 825 | Chicken | SRR10537941 |
| 17V3060F2 | <i>C. coli</i>   | 825 | Chicken | SRR10537934 |
| 18N3092F1 | <i>C. coli</i>   | 825 | Chicken | SRR10537640 |
| 18Q3016F1 | <i>C. coli</i>   | 825 | Chicken | SRR10538031 |
| 18Q3017F1 | <i>C. coli</i>   | 825 | Chicken | SRR10538030 |
| 18V3002F1 | <i>C. coli</i>   | 825 | Chicken | SRR10537932 |
| 18V3009F1 | <i>C. coli</i>   | 825 | Chicken | SRR10537925 |
| 18V3015F1 | <i>C. coli</i>   | 825 | Chicken | SRR10537920 |
| 18V3033F1 | <i>C. coli</i>   | 825 | Chicken | SRR10537899 |
| 18V3064F1 | <i>C. coli</i>   | 825 | Chicken | SRR10537864 |
| 18V3081F1 | <i>C. coli</i>   | 825 | Chicken | SRR10537841 |
| 19N3035F1 | <i>C. coli</i>   | 825 | Chicken | SRR10537620 |
| 19N3126F1 | <i>C. coli</i>   | 825 | Chicken | SRR10537599 |
| 17N3001F1 | <i>C. coli</i>   | 827 | Chicken | SRR10537820 |
| 17N3029F1 | <i>C. coli</i>   | 827 | Lamb    | SRR10537802 |
| 17N3046F1 | <i>C. coli</i>   | 827 | Chicken | SRR10537828 |
| 17N3048F1 | <i>C. coli</i>   | 827 | Chicken | SRR10537826 |
| 17Q3009F1 | <i>C. coli</i>   | 827 | Lamb    | SRR10537580 |
| 17Q3021F1 | <i>C. coli</i>   | 827 | Lamb    | SRR10537565 |
| 17Q3028F1 | <i>C. coli</i>   | 827 | Chicken | SRR10537558 |
| 17Q3030F1 | <i>C. coli</i>   | 827 | Chicken | SRR10537555 |
| 17Q3032F1 | <i>C. coli</i>   | 827 | Chicken | SRR10537553 |
| 17Q3043F1 | <i>C. coli</i>   | 827 | Chicken | SRR10537542 |
| 17Q3058F1 | <i>C. coli</i>   | 827 | Chicken | SRR10537527 |
| 17Q3065F1 | <i>C. coli</i>   | 827 | Chicken | SRR10537519 |
| 17Q3115F1 | <i>C. coli</i>   | 827 | Chicken | SRR10537459 |

|           |                |     |         |             |
|-----------|----------------|-----|---------|-------------|
| 17Q3144F1 | <i>C. coli</i> | 827 | Lamb    | SRR10538046 |
| 17V3006F1 | <i>C. coli</i> | 827 | Chicken | SRR10537991 |
| 17V3013F1 | <i>C. coli</i> | 827 | Chicken | SRR10537982 |
| 18A3010F1 | <i>C. coli</i> | 827 | Chicken | SRR10537734 |
| 18A3010F2 | <i>C. coli</i> | 827 | Chicken | SRR10537723 |
| 18A3013F1 | <i>C. coli</i> | 827 | Chicken | SRR10537690 |
| 18A3018F1 | <i>C. coli</i> | 827 | Chicken | SRR10537634 |
| 18A3019F1 | <i>C. coli</i> | 827 | Chicken | SRR10537623 |
| 18A3027F1 | <i>C. coli</i> | 827 | Chicken | SRR10537523 |
| 18N3007F1 | <i>C. coli</i> | 827 | Lamb    | SRR10537713 |
| 18N3012F1 | <i>C. coli</i> | 827 | Chicken | SRR10537709 |
| 18N3015F1 | <i>C. coli</i> | 827 | Pork    | SRR10537706 |
| 18N3019F1 | <i>C. coli</i> | 827 | Pork    | SRR10537704 |
| 18N3059F1 | <i>C. coli</i> | 827 | Lamb    | SRR10537674 |
| 18N3127F1 | <i>C. coli</i> | 827 | Chicken | SRR10537636 |
| 18N3135F1 | <i>C. coli</i> | 827 | Chicken | SRR10537631 |
| 18Q3004F1 | <i>C. coli</i> | 827 | Lamb    | SRR10538043 |
| 18Q3040F1 | <i>C. coli</i> | 827 | Chicken | SRR10538005 |
| 18V3010F1 | <i>C. coli</i> | 827 | Chicken | SRR10537924 |
| 18V3013F1 | <i>C. coli</i> | 827 | Chicken | SRR10537922 |
| 18V3016F1 | <i>C. coli</i> | 827 | Chicken | SRR10537919 |
| 18V3016F2 | <i>C. coli</i> | 827 | Chicken | SRR10537917 |
| 18V3017F1 | <i>C. coli</i> | 827 | Chicken | SRR10537916 |
| 18V3018F1 | <i>C. coli</i> | 827 | Chicken | SRR10537915 |
| 18V3023F1 | <i>C. coli</i> | 827 | Chicken | SRR10537910 |
| 18V3026F1 | <i>C. coli</i> | 827 | Chicken | SRR10537906 |
| 18V3037F1 | <i>C. coli</i> | 827 | Chicken | SRR10537894 |
| 18V3038F2 | <i>C. coli</i> | 827 | Chicken | SRR10537892 |
| 18V3039F1 | <i>C. coli</i> | 827 | Chicken | SRR10537891 |
| 18V3041F1 | <i>C. coli</i> | 827 | Chicken | SRR10537889 |
| 18V3053F1 | <i>C. coli</i> | 827 | Chicken | SRR10537876 |
| 18V3056F1 | <i>C. coli</i> | 827 | Chicken | SRR10537872 |
| 18V3058F1 | <i>C. coli</i> | 827 | Chicken | SRR10537870 |
| 18V3060F1 | <i>C. coli</i> | 827 | Chicken | SRR10537868 |
| 18V3067F1 | <i>C. coli</i> | 827 | Chicken | SRR10537860 |
| 18V3071F2 | <i>C. coli</i> | 827 | Chicken | SRR10537854 |
| 18V3076F1 | <i>C. coli</i> | 827 | Chicken | SRR10537846 |
| 18V3077F1 | <i>C. coli</i> | 827 | Chicken | SRR10537845 |
| 18V3080F1 | <i>C. coli</i> | 827 | Chicken | SRR10537842 |
| 18V3082F1 | <i>C. coli</i> | 827 | Chicken | SRR10537839 |
| 18V3086F1 | <i>C. coli</i> | 827 | Chicken | SRR10537835 |
| 19N3108F1 | <i>C. coli</i> | 827 | Beef    | SRR10537610 |
| 19N3119F1 | <i>C. coli</i> | 827 | Chicken | SRR10537602 |
| 17N3259F1 | <i>C. coli</i> | 828 | Chicken | SRR10537720 |
| 18A3004F1 | <i>C. coli</i> | 828 | Chicken | SRR10537457 |
| 18A3004F2 | <i>C. coli</i> | 828 | Chicken | SRR10537963 |
| 17V3002F1 | <i>C. coli</i> | 829 | Chicken | SRR10537994 |
| 17V3014F1 | <i>C. coli</i> | 829 | Chicken | SRR10537981 |
| 18A3005F1 | <i>C. coli</i> | 829 | Chicken | SRR10537852 |
| 18A3005F2 | <i>C. coli</i> | 829 | Chicken | SRR10537819 |

|           |                |     |         |             |
|-----------|----------------|-----|---------|-------------|
| 18A3059F1 | <i>C. coli</i> | 829 | Chicken | SRR10537918 |
| 18V3001F1 | <i>C. coli</i> | 829 | Chicken | SRR10537933 |
| 18V3068F1 | <i>C. coli</i> | 829 | Chicken | SRR10537859 |
| 17N3044F1 | <i>C. coli</i> | 832 | Chicken | SRR10537792 |
| 17N3050F1 | <i>C. coli</i> | 832 | Pork    | SRR10537824 |
| 17N3227F1 | <i>C. coli</i> | 832 | Chicken | SRR10537735 |
| 17N3251F1 | <i>C. coli</i> | 832 | Chicken | SRR10537724 |
| 17Q3037F1 | <i>C. coli</i> | 832 | Chicken | SRR10537548 |
| 17Q3038F1 | <i>C. coli</i> | 832 | Chicken | SRR10537547 |
| 17Q3077F1 | <i>C. coli</i> | 832 | Chicken | SRR10537506 |
| 17Q3138F1 | <i>C. coli</i> | 832 | Chicken | SRR10538052 |
| 18A3060F1 | <i>C. coli</i> | 832 | Chicken | SRR10537907 |
| 18A3060F2 | <i>C. coli</i> | 832 | Chicken | SRR10537896 |
| 18N3001F1 | <i>C. coli</i> | 832 | Chicken | SRR10537718 |
| 18N3051F1 | <i>C. coli</i> | 832 | Chicken | SRR10537682 |
| 18Q3014F1 | <i>C. coli</i> | 832 | Chicken | SRR10538033 |
| 18Q3023F1 | <i>C. coli</i> | 832 | Chicken | SRR10538024 |
| 18V3003F1 | <i>C. coli</i> | 832 | Chicken | SRR10537931 |
| 18V3044F1 | <i>C. coli</i> | 832 | Chicken | SRR10537886 |
| 19N3195F1 | <i>C. coli</i> | 832 | Chicken | SRR10537589 |
| 18N3079F1 | <i>C. coli</i> | 854 | Pork    | SRR10537654 |
| 18Q3052F1 | <i>C. coli</i> | 855 | Pork    | SRR10537997 |
| 17N3047F1 | <i>C. coli</i> | 860 | Chicken | SRR10537827 |
| 17N3067F1 | <i>C. coli</i> | 860 | Chicken | SRR10537780 |
| 17N3219F1 | <i>C. coli</i> | 860 | Chicken | SRR10537737 |
| 17Q3031F1 | <i>C. coli</i> | 860 | Chicken | SRR10537554 |
| 17Q3075F1 | <i>C. coli</i> | 860 | Chicken | SRR10537508 |
| 17Q3083F2 | <i>C. coli</i> | 860 | Chicken | SRR10537498 |
| 17Q3112F1 | <i>C. coli</i> | 860 | Chicken | SRR10537462 |
| 17Q3119F1 | <i>C. coli</i> | 860 | Chicken | SRR10538070 |
| 18A3002F1 | <i>C. coli</i> | 860 | Chicken | SRR10537790 |
| 18A3002F2 | <i>C. coli</i> | 860 | Chicken | SRR10537679 |
| 18A3003F1 | <i>C. coli</i> | 860 | Chicken | SRR10537568 |
| 18A3006F1 | <i>C. coli</i> | 860 | Chicken | SRR10537808 |
| 18A3009F1 | <i>C. coli</i> | 860 | Chicken | SRR10537756 |
| 18A3009F2 | <i>C. coli</i> | 860 | Chicken | SRR10537745 |
| 18A3022F1 | <i>C. coli</i> | 860 | Chicken | SRR10537590 |
| 18A3022F2 | <i>C. coli</i> | 860 | Chicken | SRR10537579 |
| 18N3030F1 | <i>C. coli</i> | 860 | Chicken | SRR10537694 |
| 18N3074F1 | <i>C. coli</i> | 860 | Chicken | SRR10537660 |
| 18N3084F1 | <i>C. coli</i> | 860 | Chicken | SRR10537649 |
| 18N3085F1 | <i>C. coli</i> | 860 | Lamb    | SRR10537648 |
| 18N3086F1 | <i>C. coli</i> | 860 | Chicken | SRR10537647 |
| 18N3123F1 | <i>C. coli</i> | 860 | Chicken | SRR10537637 |
| 18N3128F1 | <i>C. coli</i> | 860 | Chicken | SRR10537635 |
| 18N3129F1 | <i>C. coli</i> | 860 | Chicken | SRR10537633 |
| 18N3133F1 | <i>C. coli</i> | 860 | Chicken | SRR10537632 |
| 18N3138F1 | <i>C. coli</i> | 860 | Lamb    | SRR10537630 |
| 19N3022F1 | <i>C. coli</i> | 860 | Chicken | SRR10537622 |
| 19N3115F1 | <i>C. coli</i> | 860 | Chicken | SRR10537604 |

|           |                  |      |         |             |
|-----------|------------------|------|---------|-------------|
| 18V3027F1 | <i>C. coli</i>   | 894  | Chicken | SRR10537905 |
| 18V3030F1 | <i>C. coli</i>   | 894  | Chicken | SRR10537902 |
| 17N3093F1 | <i>C. coli</i>   | 966  | Chicken | SRR10537763 |
| 17N3110F1 | <i>C. coli</i>   | 966  | Chicken | SRR10537761 |
| 17Q3089F1 | <i>C. coli</i>   | 966  | Chicken | SRR10537486 |
| 17Q3089F2 | <i>C. coli</i>   | 966  | Chicken | SRR10537485 |
| 17Q3084F1 | <i>C. jejuni</i> | 991  | Chicken | SRR10537497 |
| 18V3074F1 | <i>C. jejuni</i> | 991  | Chicken | SRR10537848 |
| 18Q3032F1 | <i>C. jejuni</i> | 992  | Chicken | SRR10538014 |
| 18A3056F1 | <i>C. jejuni</i> | 996  | Chicken | SRR10537940 |
| 17N3207F1 | <i>C. coli</i>   | 1016 | Pork    | SRR10537739 |
| 17Q3015F1 | <i>C. coli</i>   | 1016 | Lamb    | SRR10537573 |
| 17N3153F1 | <i>C. coli</i>   | 1100 | Pork    | SRR10537751 |
| 18N3048F1 | <i>C. coli</i>   | 1100 | Pork    | SRR10537684 |
| 18Q3008F1 | <i>C. coli</i>   | 1100 | Pork    | SRR10538039 |
| 17Q3081F1 | <i>C. coli</i>   | 1173 | Chicken | SRR10537502 |
| 18V3005F1 | <i>C. coli</i>   | 1177 | Chicken | SRR10537928 |
| 17N3015F1 | <i>C. coli</i>   | 1181 | Chicken | SRR10537814 |
| 17N3049F1 | <i>C. coli</i>   | 1181 | Chicken | SRR10537825 |
| 17N3079F1 | <i>C. coli</i>   | 1181 | Chicken | SRR10537771 |
| 17N3091F1 | <i>C. coli</i>   | 1181 | Beef    | SRR10537765 |
| 17N3141F1 | <i>C. coli</i>   | 1181 | Beef    | SRR10537755 |
| 17N3143F1 | <i>C. coli</i>   | 1181 | Chicken | SRR10537754 |
| 17N3146F1 | <i>C. coli</i>   | 1181 | Chicken | SRR10537753 |
| 17N3172F1 | <i>C. coli</i>   | 1181 | Chicken | SRR10537748 |
| 17N3180F1 | <i>C. coli</i>   | 1181 | Chicken | SRR10537744 |
| 17N3240F1 | <i>C. coli</i>   | 1181 | Chicken | SRR10537733 |
| 17N3243F1 | <i>C. coli</i>   | 1181 | Chicken | SRR10537730 |
| 17N3246F1 | <i>C. coli</i>   | 1181 | Chicken | SRR10537728 |
| 17N3248F1 | <i>C. coli</i>   | 1181 | Chicken | SRR10537726 |
| 17Q3025F1 | <i>C. coli</i>   | 1181 | Chicken | SRR10537561 |
| 17Q3026F1 | <i>C. coli</i>   | 1181 | Chicken | SRR10537560 |
| 17Q3036F1 | <i>C. coli</i>   | 1181 | Chicken | SRR10537549 |
| 17Q3042F1 | <i>C. coli</i>   | 1181 | Chicken | SRR10537543 |
| 17Q3105F1 | <i>C. coli</i>   | 1181 | Chicken | SRR10537469 |
| 17Q3106F1 | <i>C. coli</i>   | 1181 | Chicken | SRR10537467 |
| 17Q3137F1 | <i>C. coli</i>   | 1181 | Chicken | SRR10538053 |
| 17V3011F1 | <i>C. coli</i>   | 1181 | Chicken | SRR10537986 |
| 17V3012F1 | <i>C. coli</i>   | 1181 | Chicken | SRR10537984 |
| 17V3019F1 | <i>C. coli</i>   | 1181 | Chicken | SRR10537976 |
| 17V3039F1 | <i>C. coli</i>   | 1181 | Chicken | SRR10537955 |
| 17V3048F1 | <i>C. coli</i>   | 1181 | Chicken | SRR10537947 |
| 17V3055F2 | <i>C. coli</i>   | 1181 | Chicken | SRR10537942 |
| 17V3058F1 | <i>C. coli</i>   | 1181 | Chicken | SRR10537938 |
| 17V3059F1 | <i>C. coli</i>   | 1181 | Chicken | SRR10537936 |
| 18A3065F1 | <i>C. coli</i>   | 1181 | Chicken | SRR10537832 |
| 18A3065F2 | <i>C. coli</i>   | 1181 | Chicken | SRR10537831 |
| 18N3055F1 | <i>C. coli</i>   | 1181 | Chicken | SRR10537677 |
| 18N3067F1 | <i>C. coli</i>   | 1181 | Chicken | SRR10537668 |
| 18N3083F1 | <i>C. coli</i>   | 1181 | Chicken | SRR10537650 |



|           |                  |      |         |             |
|-----------|------------------|------|---------|-------------|
| 18N3087F1 | <i>C. coli</i>   | 1181 | Chicken | SRR10537646 |
| 18N3088F1 | <i>C. coli</i>   | 1181 | Chicken | SRR10537644 |
| 18N3093F1 | <i>C. coli</i>   | 1181 | Chicken | SRR10537639 |
| 18Q3009F1 | <i>C. coli</i>   | 1181 | Pork    | SRR10538038 |
| 18V3006F1 | <i>C. coli</i>   | 1181 | Chicken | SRR10537927 |
| 18V3022F1 | <i>C. coli</i>   | 1181 | Chicken | SRR10537911 |
| 18V3035F1 | <i>C. coli</i>   | 1181 | Chicken | SRR10537897 |
| 18V3045F1 | <i>C. coli</i>   | 1181 | Chicken | SRR10537884 |
| 18V3049F1 | <i>C. coli</i>   | 1181 | Chicken | SRR10537880 |
| 18V3057F1 | <i>C. coli</i>   | 1181 | Chicken | SRR10537871 |
| 18V3066F1 | <i>C. coli</i>   | 1181 | Chicken | SRR10537862 |
| 18V3072F1 | <i>C. coli</i>   | 1181 | Chicken | SRR10537853 |
| 18V3073F2 | <i>C. coli</i>   | 1181 | Chicken | SRR10537849 |
| 18V3075F1 | <i>C. coli</i>   | 1181 | Chicken | SRR10537847 |
| 19N3082F1 | <i>C. coli</i>   | 1181 | Chicken | SRR10537617 |
| 19N3099F1 | <i>C. coli</i>   | 1181 | Chicken | SRR10537615 |
| 19N3106F1 | <i>C. coli</i>   | 1181 | Chicken | SRR10537611 |
| 18A3057F1 | <i>C. coli</i>   | 1243 | Chicken | SRR10537929 |
| 18A3062F1 | <i>C. coli</i>   | 1243 | Chicken | SRR10537874 |
| 18A3063F1 | <i>C. coli</i>   | 1243 | Chicken | SRR10537863 |
| 18A3063F2 | <i>C. coli</i>   | 1243 | Chicken | SRR10537851 |
| 18N3082F1 | <i>C. coli</i>   | 1243 | Chicken | SRR10537651 |
| 18N3075F1 | <i>C. coli</i>   | 1416 | Pork    | SRR10537659 |
| 17Q3050F1 | <i>C. coli</i>   | 1427 | Chicken | SRR10537535 |
| 17Q3085F1 | <i>C. coli</i>   | 1427 | Chicken | SRR10537495 |
| 18V3031F1 | <i>C. coli</i>   | 1427 | Chicken | SRR10537901 |
| 18N3029F1 | <i>C. coli</i>   | 1546 | Pork    | SRR10537695 |
| 17N3022F1 | <i>C. coli</i>   | 1563 | Chicken | SRR10537809 |
| 17Q3023F1 | <i>C. coli</i>   | 1766 | Chicken | SRR10537563 |
| 18V3032F1 | <i>C. jejuni</i> | 1911 | Chicken | SRR10537900 |
| 17N3258F1 | <i>C. jejuni</i> | 2083 | Chicken | SRR10537721 |
| 17V3009F1 | <i>C. jejuni</i> | 2083 | Chicken | SRR10537988 |
| 17V3032F1 | <i>C. jejuni</i> | 2083 | Chicken | SRR10537964 |
| 18N3005F1 | <i>C. jejuni</i> | 2083 | Beef    | SRR10537715 |
| 18N3070F1 | <i>C. jejuni</i> | 2083 | Chicken | SRR10537664 |
| 18N3077F1 | <i>C. jejuni</i> | 2083 | Chicken | SRR10537657 |
| 18N3078F1 | <i>C. jejuni</i> | 2083 | Chicken | SRR10537655 |
| 18Q3046F1 | <i>C. jejuni</i> | 2083 | Pork    | SRR10537999 |
| 18Q3047F1 | <i>C. jejuni</i> | 2083 | Pork    | SRR10537998 |
| 18V5088F3 | <i>C. jejuni</i> | 2083 | Chicken | SRR10537833 |
| 18V3042F1 | <i>C. coli</i>   | 2179 | Chicken | SRR10537888 |
| 18Q3043F2 | <i>C. coli</i>   | 2733 | Pork    | SRR10538001 |
| 17N3138F1 | <i>C. coli</i>   | 3612 | Pork    | SRR10537757 |
| 17N3257F1 | <i>C. coli</i>   | 3985 | Pork    | SRR10537722 |
| 17Q3022F1 | <i>C. coli</i>   | 3985 | Chicken | SRR10537564 |
| 17Q3033F1 | <i>C. coli</i>   | 3985 | Chicken | SRR10537552 |
| 17Q3068F1 | <i>C. coli</i>   | 3985 | Chicken | SRR10537516 |
| 17Q3078F1 | <i>C. coli</i>   | 3985 | Chicken | SRR10537505 |
| 17Q3079F1 | <i>C. coli</i>   | 3985 | Chicken | SRR10537504 |
| 17Q3086F2 | <i>C. coli</i>   | 3985 | Chicken | SRR10537492 |

|           |                  |      |         |             |
|-----------|------------------|------|---------|-------------|
| 17Q3116F1 | <i>C. coli</i>   | 3985 | Chicken | SRR10537458 |
| 17Q3126F1 | <i>C. coli</i>   | 3985 | Chicken | SRR10538063 |
| 18A3046F1 | <i>C. coli</i>   | 3985 | Chicken | SRR10538051 |
| 18Q3026F1 | <i>C. coli</i>   | 3985 | Chicken | SRR10538021 |
| 18Q3028F1 | <i>C. coli</i>   | 3985 | Chicken | SRR10538019 |
| 18Q3033F1 | <i>C. coli</i>   | 3985 | Chicken | SRR10538013 |
| 18Q3036F1 | <i>C. coli</i>   | 3985 | Chicken | SRR10538010 |
| 18N3052F1 | <i>C. coli</i>   | 4044 | Chicken | SRR10537681 |
| 17N3021F1 | <i>C. coli</i>   | 4175 | Chicken | SRR10537810 |
| 17N3068F1 | <i>C. coli</i>   | 4175 | Chicken | SRR10537779 |
| 17N3084F1 | <i>C. coli</i>   | 4175 | Chicken | SRR10537769 |
| 17N3092F1 | <i>C. coli</i>   | 4175 | Chicken | SRR10537764 |
| 17Q3024F1 | <i>C. coli</i>   | 4175 | Chicken | SRR10537562 |
| 17Q3041F1 | <i>C. coli</i>   | 4175 | Chicken | SRR10537544 |
| 17V3020F1 | <i>C. coli</i>   | 4175 | Chicken | SRR10537975 |
| 18N3017F1 | <i>C. coli</i>   | 4175 | Chicken | SRR10537705 |
| 18N3045F1 | <i>C. coli</i>   | 4175 | Chicken | SRR10537686 |
| 18N3089F1 | <i>C. coli</i>   | 4175 | Lamb    | SRR10537643 |
| 18Q3024F1 | <i>C. coli</i>   | 4175 | Chicken | SRR10538023 |
| 18V3085F1 | <i>C. coli</i>   | 4175 | Chicken | SRR10537837 |
| 19N3149F1 | <i>C. coli</i>   | 4175 | Chicken | SRR10537597 |
| 17Q3083F1 | <i>C. jejuni</i> | 4896 | Chicken | SRR10537499 |
| 17Q3088F1 | <i>C. jejuni</i> | 4896 | Chicken | SRR10537488 |
| 17Q3088F2 | <i>C. jejuni</i> | 4896 | Chicken | SRR10537487 |
| 17Q3095F1 | <i>C. jejuni</i> | 4896 | Chicken | SRR10537480 |
| 17Q3139F1 | <i>C. jejuni</i> | 4896 | Chicken | SRR10538050 |
| 17V3008F1 | <i>C. jejuni</i> | 4896 | Chicken | SRR10537989 |
| 17V3018F1 | <i>C. jejuni</i> | 4896 | Chicken | SRR10537977 |
| 17V3057F1 | <i>C. jejuni</i> | 4896 | Chicken | SRR10537939 |
| 18A3069F1 | <i>C. jejuni</i> | 4896 | Chicken | SRR10537822 |
| 18Q3035F1 | <i>C. jejuni</i> | 4896 | Chicken | SRR10538011 |
| 18Q3039F1 | <i>C. jejuni</i> | 4896 | Chicken | SRR10538006 |
| 18V3011F1 | <i>C. jejuni</i> | 4896 | Chicken | SRR10537923 |
| 18V3021F1 | <i>C. jejuni</i> | 4896 | Chicken | SRR10537912 |
| 17N3032F1 | <i>C. jejuni</i> | 5687 | Lamb    | SRR10537799 |
| 17N3034F1 | <i>C. jejuni</i> | 5687 | Beef    | SRR10537796 |
| 17N3035F1 | <i>C. jejuni</i> | 5687 | Lamb    | SRR10537795 |
| 17N3125F1 | <i>C. jejuni</i> | 5687 | Chicken | SRR10537759 |
| 17Q3006F1 | <i>C. jejuni</i> | 5687 | Beef    | SRR10537583 |
| 17Q3019F1 | <i>C. jejuni</i> | 5687 | Lamb    | SRR10537569 |
| 17Q3020F1 | <i>C. jejuni</i> | 5687 | Lamb    | SRR10537566 |
| 17Q3073F1 | <i>C. coli</i>   | 6159 | Chicken | SRR10537510 |
| 17Q3142F1 | <i>C. jejuni</i> | 6891 | Chicken | SRR10538047 |
| 17N3010F1 | <i>C. jejuni</i> | 7323 | Pork    | SRR10537817 |
| 17N3057F1 | <i>C. jejuni</i> | 7323 | Chicken | SRR10537785 |
| 17Q3029F1 | <i>C. jejuni</i> | 7323 | Chicken | SRR10537557 |
| 17Q3069F1 | <i>C. jejuni</i> | 7323 | Chicken | SRR10537515 |
| 17Q3086F1 | <i>C. jejuni</i> | 7323 | Chicken | SRR10537493 |
| 17Q3125F1 | <i>C. jejuni</i> | 7323 | Chicken | SRR10538064 |
| 17Q3130F1 | <i>C. jejuni</i> | 7323 | Chicken | SRR10538059 |

|           |                  |      |         |             |
|-----------|------------------|------|---------|-------------|
| 17Q3140F1 | <i>C. jejuni</i> | 7323 | Chicken | SRR10538049 |
| 18N3004F1 | <i>C. jejuni</i> | 7323 | Chicken | SRR10537716 |
| 18N3025F1 | <i>C. jejuni</i> | 7323 | Beef    | SRR10537699 |
| 18Q3041F1 | <i>C. jejuni</i> | 7323 | Pork    | SRR10538004 |
| 18V3069F1 | <i>C. jejuni</i> | 7323 | Chicken | SRR10537857 |
| 18V3073F1 | <i>C. jejuni</i> | 7323 | Chicken | SRR10537850 |
| 19N3192F1 | <i>C. jejuni</i> | 7323 | Chicken | SRR10537591 |
| 17N3151F1 | <i>C. coli</i>   | 9419 | Chicken | SRR10537752 |
| 17N3241F1 | <i>C. coli</i>   | 9419 | Chicken | SRR10537732 |
| 17N3245F1 | <i>C. coli</i>   | 9419 | Chicken | SRR10537729 |
| 17N3247F1 | <i>C. coli</i>   | 9419 | Chicken | SRR10537727 |
| 17Q3003F1 | <i>C. coli</i>   | 9419 | Beef    | SRR10537586 |
| 17Q3059F1 | <i>C. coli</i>   | 9419 | Chicken | SRR10537526 |
| 17Q3103F1 | <i>C. coli</i>   | 9419 | Chicken | SRR10537471 |
| 17Q3104F1 | <i>C. coli</i>   | 9419 | Chicken | SRR10537470 |
| 17Q3110F2 | <i>C. coli</i>   | 9419 | Chicken | SRR10537464 |
| 17V3021F1 | <i>C. coli</i>   | 9419 | Chicken | SRR10537973 |
| 18N3028F1 | <i>C. coli</i>   | 9419 | Chicken | SRR10537696 |
| 18N3032F1 | <i>C. coli</i>   | 9419 | Chicken | SRR10537692 |
| 18N3068F1 | <i>C. coli</i>   | 9419 | Chicken | SRR10537666 |
| 18Q3029F1 | <i>C. coli</i>   | 9419 | Chicken | SRR10538017 |
| 19N3014F1 | <i>C. coli</i>   | 9419 | Chicken | SRR10537626 |
| 19N3188F1 | <i>C. coli</i>   | 9419 | Chicken | SRR10537594 |
| 18A3001F1 | <i>C. coli</i>   | 9420 | Chicken | SRR10537791 |
| 18N3072F1 | <i>C. coli</i>   | 9420 | Chicken | SRR10537662 |
| 19N3109F1 | <i>C. coli</i>   | 9420 | Lamb    | SRR10537609 |
| 19N3114F1 | <i>C. coli</i>   | 9420 | Chicken | SRR10537605 |
| 19N3152F1 | <i>C. coli</i>   | 9420 | Chicken | SRR10537596 |
| 17N3221F1 | <i>C. jejuni</i> | 9425 | Chicken | SRR10537736 |
| 17Q3124F1 | <i>C. jejuni</i> | 9425 | Chicken | SRR10538065 |
| 17V3058F2 | <i>C. jejuni</i> | 9429 | Chicken | SRR10537937 |
| 18V3020F1 | <i>C. jejuni</i> | 9429 | Chicken | SRR10537913 |
| 18V3040F1 | <i>C. jejuni</i> | 9429 | Chicken | SRR10537890 |
| 18V3051F1 | <i>C. jejuni</i> | 9429 | Chicken | SRR10537878 |
| 18V3055F1 | <i>C. jejuni</i> | 9429 | Chicken | SRR10537873 |
| 18V3059F1 | <i>C. jejuni</i> | 9429 | Chicken | SRR10537869 |
| 17Q3064F1 | <i>C. jejuni</i> | 9432 | Chicken | SRR10537520 |
| 18A3008F1 | <i>C. jejuni</i> | 9432 | Chicken | SRR10537778 |
| 18A3008F2 | <i>C. jejuni</i> | 9432 | Chicken | SRR10537767 |
| 18A3020F1 | <i>C. jejuni</i> | 9432 | Chicken | SRR10537612 |
| 18A3026F1 | <i>C. jejuni</i> | 9432 | Chicken | SRR10537534 |
| 18A3061F1 | <i>C. jejuni</i> | 9432 | Chicken | SRR10537885 |
| 18A3070F1 | <i>C. jejuni</i> | 9432 | Chicken | SRR10537821 |
| 18N3071F1 | <i>C. jejuni</i> | 9432 | Lamb    | SRR10537663 |
| 18N3091F1 | <i>C. jejuni</i> | 9432 | Chicken | SRR10537641 |
| 18V3052F1 | <i>C. jejuni</i> | 9432 | Chicken | SRR10537877 |
| 19N3112F1 | <i>C. jejuni</i> | 9432 | Chicken | SRR10537606 |
| 17N3051F1 | <i>C. coli</i>   | 9433 | Pork    | SRR10537788 |
| 17N3260F1 | <i>C. coli</i>   | 9433 | Pork    | SRR10537719 |
| 17Q3053F1 | <i>C. coli</i>   | 9433 | Chicken | SRR10537532 |

|           |                  |       |         |             |
|-----------|------------------|-------|---------|-------------|
| 17N3184F1 | <i>C. coli</i>   | 9435  | Pork    | SRR10537742 |
| 17N3206F1 | <i>C. coli</i>   | 9435  | Chicken | SRR10537740 |
| 17N3066F1 | <i>C. coli</i>   | 9436  | Chicken | SRR10537781 |
| 17N3119F1 | <i>C. coli</i>   | 9436  | Chicken | SRR10537760 |
| 17Q3027F1 | <i>C. coli</i>   | 9436  | Chicken | SRR10537559 |
| 17Q3034F1 | <i>C. coli</i>   | 9436  | Chicken | SRR10537551 |
| 17Q3096F1 | <i>C. coli</i>   | 9436  | Chicken | SRR10537478 |
| 18A3014F1 | <i>C. coli</i>   | 9436  | Chicken | SRR10537678 |
| 18N3024F1 | <i>C. coli</i>   | 9436  | Chicken | SRR10537700 |
| 18N3147F1 | <i>C. coli</i>   | 9436  | Chicken | SRR10537629 |
| 19N3017F1 | <i>C. coli</i>   | 9436  | Chicken | SRR10537625 |
| 19N3021F1 | <i>C. coli</i>   | 9436  | Chicken | SRR10537624 |
| 19N3057F1 | <i>C. coli</i>   | 9436  | Chicken | SRR10537618 |
| 19N3121F1 | <i>C. coli</i>   | 9436  | Chicken | SRR10537600 |
| 17Q3099F1 | <i>C. coli</i>   | 9789  | Chicken | SRR10537475 |
| 18Q3018F1 | <i>C. coli</i>   | 9789  | Chicken | SRR10538028 |
| 18Q3019F1 | <i>C. coli</i>   | 9789  | Chicken | SRR10538027 |
| 17V3023F1 | <i>C. coli</i>   | 9912  | Chicken | SRR10537971 |
| 17N3020F1 | <i>C. jejuni</i> | 10123 | Chicken | SRR10537811 |
| 17Q3054F1 | <i>C. jejuni</i> | 10123 | Chicken | SRR10537531 |
| 17N3023F1 | <i>C. jejuni</i> | 10124 | Chicken | SRR10537807 |
| 17N3043F1 | <i>C. jejuni</i> | 10125 | Lamb    | SRR10537793 |
| 17N3078F1 | <i>C. jejuni</i> | 10126 | Chicken | SRR10537772 |
| 17N3250F1 | <i>C. jejuni</i> | 10127 | Chicken | SRR10537725 |
| 17Q3123F1 | <i>C. jejuni</i> | 10127 | Chicken | SRR10538066 |
| 18N3062F1 | <i>C. jejuni</i> | 10128 | Pork    | SRR10537672 |
| 17Q3117F1 | <i>C. jejuni</i> | 10129 | Chicken | SRR10538072 |
| 17Q3118F1 | <i>C. jejuni</i> | 10130 | Chicken | SRR10538071 |
| 17Q3141F1 | <i>C. jejuni</i> | 10130 | Chicken | SRR10538048 |
| 18Q3025F1 | <i>C. jejuni</i> | 10130 | Chicken | SRR10538022 |
| 18A3066F1 | <i>C. jejuni</i> | 10134 | Chicken | SRR10537830 |
| 19N3143F1 | <i>C. jejuni</i> | 10134 | Chicken | SRR10537598 |
| 18A3045F1 | <i>C. jejuni</i> | 10136 | Chicken | SRR10538062 |
| 18A3053F1 | <i>C. jejuni</i> | 10137 | Beef    | SRR10537974 |
| 18Q3013F1 | <i>C. jejuni</i> | 10139 | Chicken | SRR10538034 |
| 18N3046F1 | <i>C. jejuni</i> | 10140 | Pork    | SRR10537685 |
| 17N3154F1 | <i>C. coli</i>   | 10141 | Pork    | SRR10537750 |
| 17N3215F1 | <i>C. coli</i>   | 10142 | Pork    | SRR10537738 |
| 17N3071F1 | <i>C. coli</i>   | 10144 | Chicken | SRR10537776 |
| 17N3181F1 | <i>C. coli</i>   | 10144 | Chicken | SRR10537743 |
| 17Q3035F1 | <i>C. coli</i>   | 10144 | Chicken | SRR10537550 |
| 17Q3070F1 | <i>C. coli</i>   | 10144 | Chicken | SRR10537514 |
| 17N3024F1 | <i>C. coli</i>   | 10145 | Chicken | SRR10537806 |
| 17Q3047F1 | <i>C. coli</i>   | 10145 | Chicken | SRR10537538 |
| 17Q3052F1 | <i>C. coli</i>   | 10145 | Chicken | SRR10537533 |
| 17Q3076F1 | <i>C. coli</i>   | 10147 | Chicken | SRR10537507 |
| 17Q3084F2 | <i>C. coli</i>   | 10148 | Chicken | SRR10537496 |
| 17V3007F1 | <i>C. coli</i>   | 10150 | Chicken | SRR10537990 |
| 18A3055F1 | <i>C. coli</i>   | 10151 | Chicken | SRR10537951 |
| 18N3034F1 | <i>C. coli</i>   | 10154 | Pork    | SRR10537689 |

|           |                |       |         |             |
|-----------|----------------|-------|---------|-------------|
| 18N3080F1 | <i>C. coli</i> | 10156 | Chicken | SRR10537653 |
| 17Q3129F1 | <i>C. coli</i> | 10159 | Chicken | SRR10538060 |
| 18Q3007F1 | <i>C. coli</i> | 10159 | Pork    | SRR10538041 |
| 18Q3044F1 | <i>C. coli</i> | 10160 | Pork    | SRR10538000 |
| 18V3029F1 | <i>C. coli</i> | 10162 | Chicken | SRR10537903 |
| 18V3034F1 | <i>C. coli</i> | 10163 | Chicken | SRR10537898 |
| 17Q3044F1 | <i>C. coli</i> | 10164 | Chicken | SRR10537541 |
| 17Q3045F1 | <i>C. coli</i> | 10164 | Chicken | SRR10537540 |
| 17Q3046F1 | <i>C. coli</i> | 10164 | Chicken | SRR10537539 |
| 17Q3087F2 | <i>C. coli</i> | 10164 | Chicken | SRR10537489 |
| 17V3031F2 | <i>C. coli</i> | 10166 | Chicken | SRR10537965 |
| 18A3052F1 | <i>C. coli</i> | 10167 | Pork    | SRR10537996 |
| 18A3052F2 | <i>C. coli</i> | 10167 | Pork    | SRR10537985 |
| 18N3027F1 | <i>C. coli</i> | 10170 | Chicken | SRR10537697 |
| 18N3061F1 | <i>C. coli</i> | 10171 | Pork    | SRR10537673 |
| 18Q3042F1 | <i>C. coli</i> | 10174 | Pork    | SRR10538003 |
| 19N3190F1 | <i>C. coli</i> | 10176 | Pork    | SRR10537593 |
| 17N3018F1 | <i>C. coli</i> | -     | Chicken | SRR10537812 |
| 17V3040F1 | <i>C. coli</i> | -     | Chicken | SRR10537954 |
| 18N3006F1 | <i>C. coli</i> | -     | Chicken | SRR10537714 |
| 18V3019F1 | <i>C. coli</i> | -     | Chicken | SRR10537914 |

---
